# Supplementary material for: Surface plasmon enhancement in silver nanowires and bilayer two-dimensional materials
Source: Royal Society of Chemistry journal article supplement (doi:10.1039/d3nr05810g), 2024-01-01
Supplement: d3nr05810g1.pdf [file d3nr05810g1.pdf]

Supporting Information

## Surface plasmon enhancement in silver nanowire and bilayer two-dimensional materials

Weibin Zhang<sup>a</sup>, Cunwei Kong<sup>a</sup>, Xinfeng Zhang<sup>a,b</sup>, Quan Wang<sup>a,c\*</sup> and Wei Xue<sup>d\*</sup>

<sup>a</sup>Zhenjiang Key Laboratory of Advanced Sensing Materials and Devices, School of Mechanical Engineering, Jiangsu University, Zhenjiang 212013, China

<sup>b</sup>Jiangsu Zorrun Semiconductor Co.,Ltd, Nantong 226500, China

<sup>c</sup>State Key Laboratory of Transducer Technology, Chinese Academy of Sciences, Shanghai 200050, China

<sup>d</sup>Oujiang Laboratory (Zhejiang Lab for Regenerative Medicine, Vision and Brain Health), Wenzhou, Zhejiang, P.R. China

### 1. Preparation of Ag/tBLM phototransistor

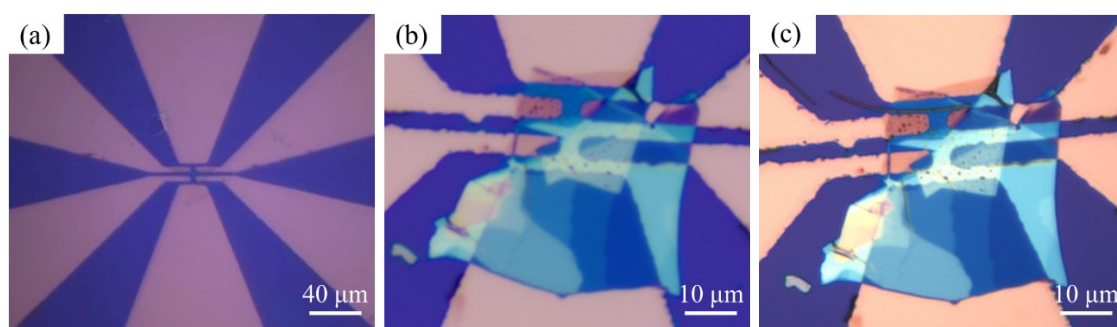

**Fig. S1.** Device fabrication. (a) Optical microscope diagram of electrodes. Optical microscope diagram of the device (a) before the transfer of Ag NW and (b) after the transfer of Ag NW.

---

\*Author to whom correspondence should be addressed. Electronic mail: [wangq@ujs.edu.cn](mailto:wangq@ujs.edu.cn) (Q.Wang)

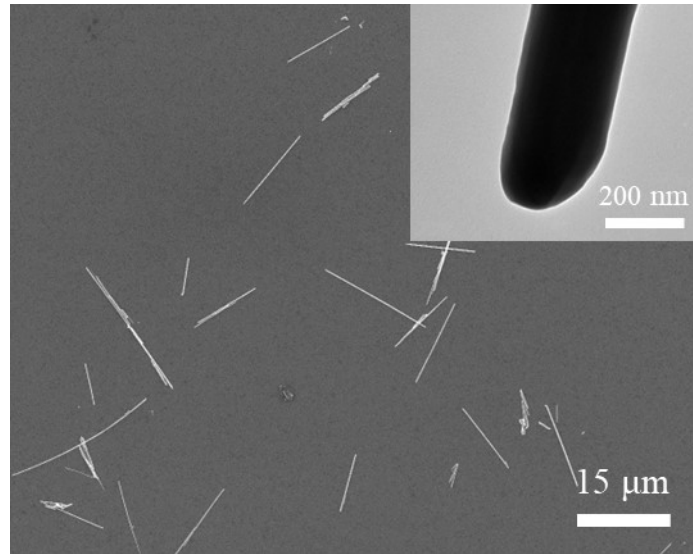

**Fig. S2.** SEM image of the Ag NWs. Inset: TEM image of single Ag NW.

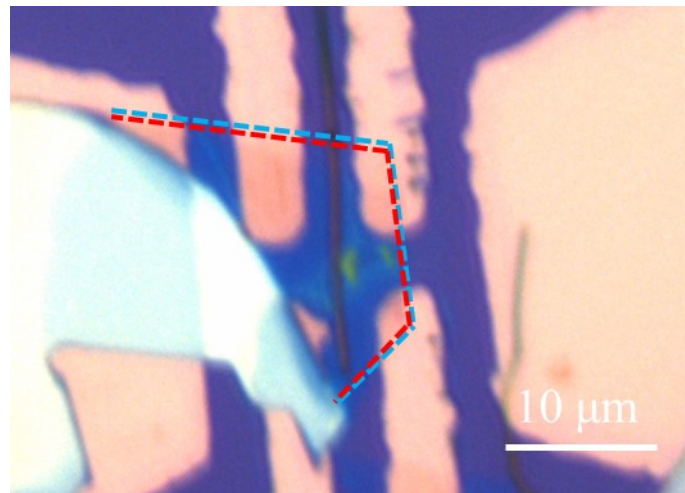

**Fig. S3.** Optical microscope diagram of the Ag/pBLM device.

## 2. PL spectrum characterization

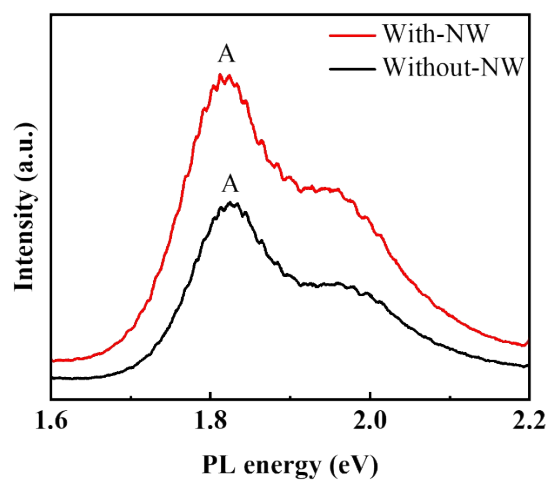

**Fig. S4.** PL spectra comparison of the Ag/pBLM composite structure.

### 3. Raman spectrum characterization

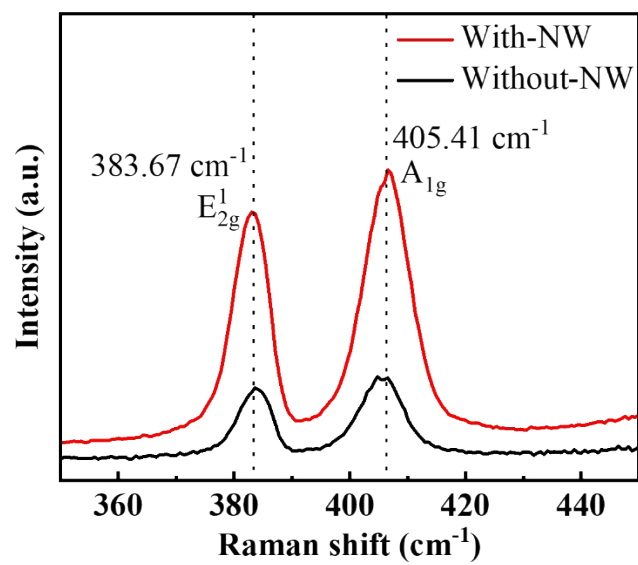

**Fig. S5.** Raman spectra comparison of the Ag/pBLM composite structure.

#### 4. PL intensity mapping

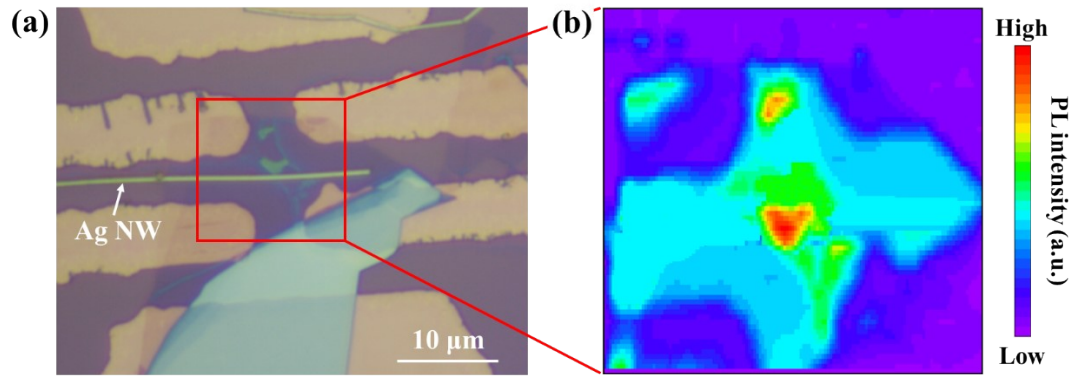

**Fig. S6.** (a) Optical microscope diagram and (b) PL intensity mapping of the Ag/pBLM phototransistor.

## 5. Output characteristic test

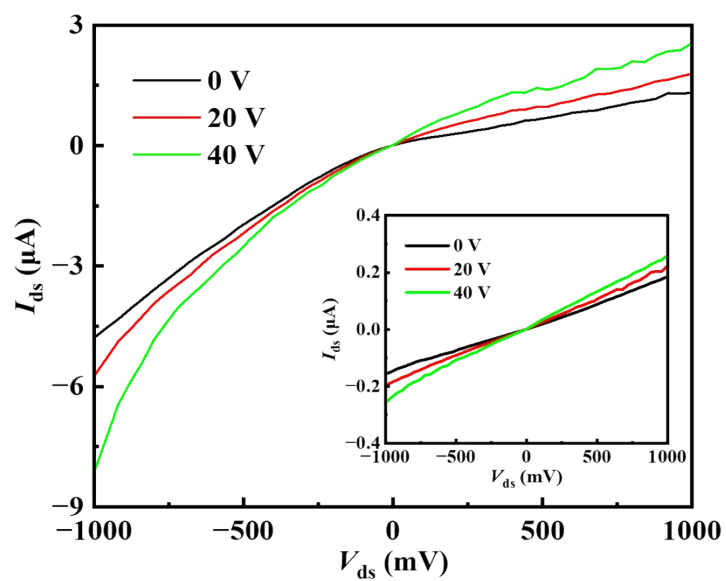

**Fig. S7.** Output characteristic curves of the Ag/pBLM device under the 520 nm laser. Inset: Output characteristic curves without light.

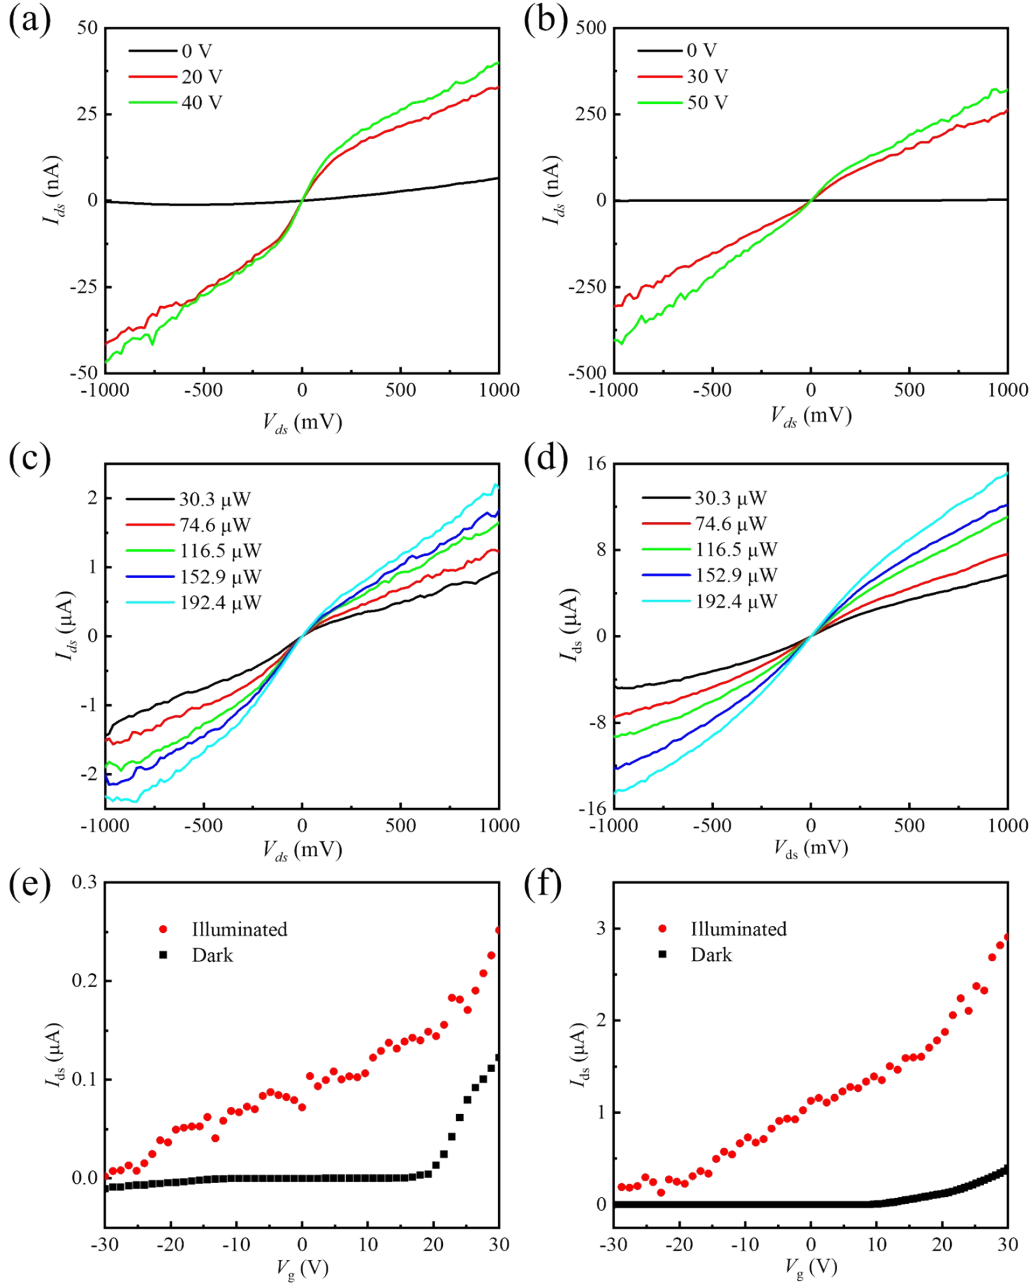

**Fig. S8.** Comparison of photoelectric performance in MoS<sub>2</sub> phototransistors. Output characteristic curves without light of (a) pBLM and (b) tBLM. Output characteristic curves under the light of different power of (c) pBLM and (d) tBLM. Transfer characteristic curves with and without light of (e) pBLM and (f) tBLM.

The photoresponsivity of the tBLM phototransistor is 13.05 mA/W, compared with the 0.67 mA/W of the pBLM phototransistor. In addition, the specific detectivity of the tBLM phototransistor was enhanced from

$1.69 \times 10^6$  to  $1.83 \times 10^7$  Jones under the effect of interlayer twist.

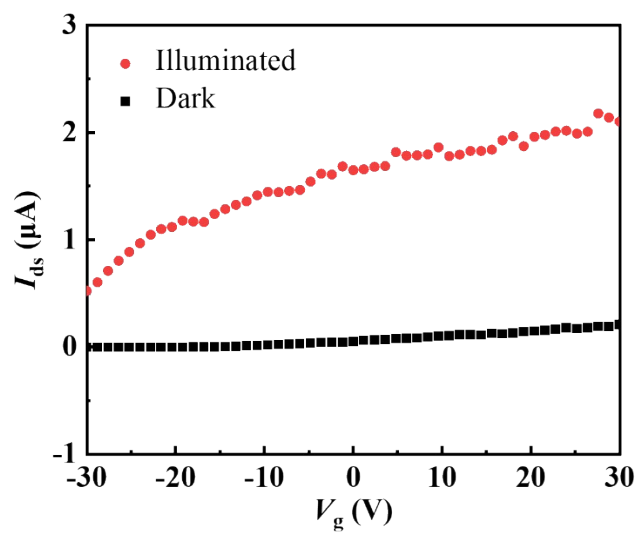

**Fig. S9.** Transfer characteristic curves of the pBLM device.
